# Supplementary material for: The collection of the Herpetological Museum of the University of Antioquia (northwestern Colombia)
Source: Biodivers Data J. 2015 Feb 5;(3):e1325. doi: 10.3897/BDJ.3.e1325 (PMC4339813; doi:10.3897/BDJ.3.e1325)
Supplement: Supplementary material 1 — Biomes represented in MHUA collection [file biodiversity_data_journal-3-e1325-s001.xlsx]

## Sheet: Hoja1
Biome	Number of specimens
Magdalena Valley montane forests	6740
Magdalena-Urabá moist forests	2988
Cauca Valley montane forests	1000
Chocó-DariÚn moist forests	689
Northwestern Andean montane forests	403
Cordillera Oriental montane forests	235
Guajira-Barranquilla xeric scrub	221
Cauca Valley dry forests	123
Northern Andean páramo	109
Southwest Amazon moist forests	97
Amazon-Orinoco-Southern Caribbean mangroves	60
Magdalena Valley dry forests	58
Sinú Valley dry forests	58
Llanos	40
Purus varzeá	39
South American Pacific mangroves	39
Caqueta moist forests	8
Eastern Cordillera real montane forests	8
Apure-Villavicencio dry forests	7
Iquitos varzeá	6
Eastern Panamanian montane forests	4
Negro-Branco moist forests	4
Rio Negro campinarana	2
Solim§es-Japurá moist forests	2
Western Ecuador moist forests	2
Catatumbo moist forests	1
Central American dry forests	1
Guianan piedmont and lowland moist forests	1
Japurá-Solimoes-Negro moist forests	1
Napo moist forests	1
Patía Valley dry forests	1
Santa Marta montane forests	1
Santa Marta páramo	1
Venezuelan Andes montane forests	1
