# Supplementary material for: The collection of the Herpetological Museum of the University of Antioquia (northwestern Colombia)
Source: Biodivers Data J. 2015 Feb 5;(3):e1325. doi: 10.3897/BDJ.3.e1325 (PMC4339813; doi:10.3897/BDJ.3.e1325)
Supplement: Supplementary material 2 — Altitudinal distribution of specimens in MHUA. [file biodiversity_data_journal-3-e1325-s002.xlsx]

## Sheet: Hoja1
Elevation band	Number of specimens
0 - 500	4974
501 - 1000	1477
1001 - 1500	1449
1501 - 2000	2640
2001 - 2500	1031
2501 - 3000	1056
3001 - 3500	181
3501 - 4000	51
