# Supplementary material for: The collection of the Herpetological Museum of the University of Antioquia (northwestern Colombia)
Source: Biodivers Data J. 2015 Feb 5;(3):e1325. doi: 10.3897/BDJ.3.e1325 (PMC4339813; doi:10.3897/BDJ.3.e1325)
Supplement: Supplementary material 3 — Temporal distribution of the specimen records in the MHUA collections [file biodiversity_data_journal-3-e1325-s003.xlsx]

## Sheet: Hoja1
Temporal distribution of the specimen records in the MHUA collections.
year	Amphibia	Reptilia	Total
1971	1		1
1980	1		1
1983	1		1
1985	1		1
1986		1	1
1987		1	1
1993	14	93	107
1994	17		17
1995	2		2
1996	67	18	85
1997	381	111	492
1998	344	164	508
1999	175	87	262
2000	264	151	415
2001	910	388	1298
2002	671	288	959
2003	510	332	842
2004	885	310	1195
2005	393	316	709
2006	831	549	1380
2007	342	226	568
2008	464	400	864
2009	358	515	873
2010	289	431	720
2011	209	186	395
2012	442	175	617
2013	429	90	519
2014	18	3	21
